# Supplementary material
Source: PubMed Central journal article supplement (PMC7367029)
Supplement: mmc1.pdf [file mmc1.pdf]

**Supplementary Table 1. Symptomatic characteristics of patients infected with COVID-19 without fever**

|                           | Patients without fever | Disease Severity |          | <i>p</i> value |
|---------------------------|------------------------|------------------|----------|----------------|
|                           |                        | Non-severe       | Severe   |                |
| Signs and symptoms, n (%) |                        |                  |          |                |
| N                         | 236                    | 128              | 108      |                |
| Cough                     | 135(57.2)              | 64(50.0)         | 71(65.7) | 0.01           |
| Fatigue                   | 42(17.8)               | 20(15.6)         | 22(20.4) | 0.34           |
| Chest tightness           | 55(23.3)               | 27(21.1)         | 28(25.9) | 0.38           |
| Diarrhea                  | 17(7.2)                | 8(3.4)           | 9(3.8)   | 0.54           |
| Dyspnea                   | 14(5.9)                | 5(3.9)           | 9(8.3)   | 0.15           |
| Loss of appetite          | 13(5.5)                | 6(4.7)           | 7(6.5)   | 0.55           |
| Myalgia                   | 13(5.5)                | 5(3.9)           | 8(7.4)   | 0.24           |
| Dizziness/headache        | 4(1.7)                 | 1(0.8)           | 3(2.8)   | 0.24           |
| Pharyngalgia              | 5(2.1)                 | 3(2.3)           | 2(1.9)   | 1.00           |
| Nausea                    | 4(1.7)                 | 2(1.6)           | 2(1.9)   | 1.00           |
| Vomiting                  | 3(1.3)                 | 2(1.6)           | 1(0.9)   | 1.00           |
| Runny nose                | 2(0.9)                 | 1(0.8)           | 1(0.9)   | 1.00           |
| Stuffy nose               | 1(0.4)                 | 0(0.0)           | 1(0.9)   | -              |

COVID-19, coronavirus disease 2019. The percentages were calculated column-wise.

**Supplementary Table2. Symptomatic characteristics and laboratory findings of patients infected with COVID-19 without underlying disease**

|                                             | All patient        | Disease Severity   |                    | <i>p</i> value |
|---------------------------------------------|--------------------|--------------------|--------------------|----------------|
|                                             |                    | Non-severe         | Severe             |                |
| Signs and symptoms, n (%)                   |                    |                    |                    |                |
| N                                           | 1014               | 532                | 482                |                |
| Fever                                       | 882(87.0)          | 451(84.8)          | 431(89.4)          | 0.03           |
| Cough                                       | 361(35.6)          | 162(30.5)          | 199(41.3)          | 0.0003         |
| Fatigue                                     | 209(20.6)          | 101(19.0)          | 108(22.4)          | 0.18           |
| Chest tightness                             | 123(12.1)          | 42(7.9)            | 81(16.8)           | <0.0001        |
| Diarrhea                                    | 52(5.1)            | 24(4.5)            | 28(5.8)            | 0.35           |
| Dyspnea                                     | 52(5.1)            | 22(4.1)            | 30(6.2)            | 0.13           |
| Loss of appetite                            | 37(3.7)            | 14(532.0)          | 23(482.0)          | 0.07           |
| Myalgia                                     | 36(3.6)            | 18(3.4)            | 18(3.7)            | 0.76           |
| Dizziness/headache                          | 19(1.9)            | 11(2.1)            | 8(1.7)             | 0.63           |
| Pharyngalgia                                | 16(1.6)            | 9(1.7)             | 7(1.5)             | 0.76           |
| Nausea                                      | 14(1.4)            | 10(1.9)            | 4(0.8)             | 0.15           |
| Vomiting                                    | 16(1.6)            | 10(1.9)            | 6(1.2)             | 0.42           |
| Runny nose                                  | 4(0.4)             | 1(0.2)             | 3(0.6)             | 0.35           |
| Stuffy nose                                 | 1(0.1)             | 0(0.0)             | 1(0.2)             | -              |
| Laboratory findings                         |                    |                    |                    |                |
| White blood cell count, ×10 <sup>9</sup> /L | 5.4(4.3-7.0)       | 5.2(4.1-6.7)       | 5.7(4.5-7.4)       | 0.0005         |
| Lymphocyte count, ×10 <sup>9</sup> /L       | 1.1(0.8-1.5)       | 1.2(0.8-1.5)       | 1.1(0.8-1.5)       | 0.15           |
| Lymphocyte percentage (%)                   | 21.4(14.3-29.2)    | 22.5(15.8-30.1)    | 20.8(13.0-28.3)    | 0.001          |
| Monocyte count, ×10 <sup>9</sup> /L         | 0.5(0.4-0.6)       | 0.5(0.4-0.6)       | 0.5(0.4-0.6)       | 0.42           |
| Monocyte percentage (%)                     | 8.4(6.7-10.8)      | 8.7(6.9-11.0)      | 8.2(6.5-10.5)      | 0.01           |
| Neutrophil count, ×10 <sup>9</sup> /L       | 3.7(2.6-5.1)       | 3.5(2.4-4.7)       | 3.8(2.8-5.4)       | 0.0001         |
| Neutrophil percentage (%)                   | 67.7(58.5-76.9)    | 66.4(57.8-75.1)    | 69.1(59.9-78.9)    | 0.0007         |
| Platelet count, ×10 <sup>9</sup> /L         | 227.0(166.0-302.0) | 208.0(161.0-290.0) | 245.0(175.5-323.5) | 0.0002         |
| Hemoglobin, g/L                             | 127.0(117.0-138.0) | 128.0(118.0-138.0) | 126.0(115.0-137.0) | 0.03           |
| Alanine aminotransferase, U/L               | 22.0(14.0-36.0)    | 20.0(13.0-35.0)    | 24.0(15.0-37.0)    | 0.03           |
| Aspartate aminotransferase, U/L             | 25.0(19.0-36.0)    | 25.0(18.0-35.0)    | 26.0(19.0-37.0)    | 0.15           |
| Albumin, g/L                                | 35.4(32.2-39.2)    | 35.7(32.8-39.5)    | 34.9(31.5-38.9)    | 0.002          |
| Creatinine, umol/L                          | 66.0(55.0-80.0)    | 66.0(55.0-81.0)    | 65.0(55.0-80.0)    | 0.77           |
| Urea, mmol/L                                | 4.1(3.2-5.3)       | 3.9(3.0-5.0)       | 4.3(3.4-5.5)       | 0.0002         |
| Lactate dehydrogenase, U/L                  | 264.5(211.0-333.0) | 259.0(205.0-317.0) | 271.5(216.0-356.0) | 0.005          |
| Creatine kinase, U/L                        | 65.0(45.0-119.0)   | 67.0(46.0-117.0)   | 63.0(44.5-121.5)   | 0.85           |
| C-reactive protein, mg/L                    | 17.9(3.9-54.0)     | 16.6(3.9-48.1)     | 19.4(3.9-65.6)     | 0.11           |
| Prothrombin time, s                         | 13.8(13.2-14.4)    | 13.7(13.2-14.3)    | 13.9(13.3-14.5)    | 0.007          |

|                      |                 |                 |                 |         |
|----------------------|-----------------|-----------------|-----------------|---------|
| APTT, s              | 38.7(35.5-42.6) | 38.9(35.8-42.9) | 38.4(35.3-42.2) | 0.11    |
| D-dimer, mg/L        | 0.6(0.4-1.4)    | 0.6(0.3-1.2)    | 0.7(0.4-1.6)    | 0.0007  |
| Thrombin time, s     | 16.6(15.9-17.5) | 16.5(15.9-17.3) | 16.7(15.9-17.7) | 0.03    |
| Procalcitonin, ng/ml | 0.05(0.03-0.08) | 0.05(0.03-0.07) | 0.05(0.04-0.09) | <0.0001 |

---

Data are medians (IQR), number (%), or No./total No. (%). COVID-19, coronavirus disease 2019, APTT, activated partial thromboplastin time; IQR, inter-quartile ranges. The percentages were calculated column-wise.

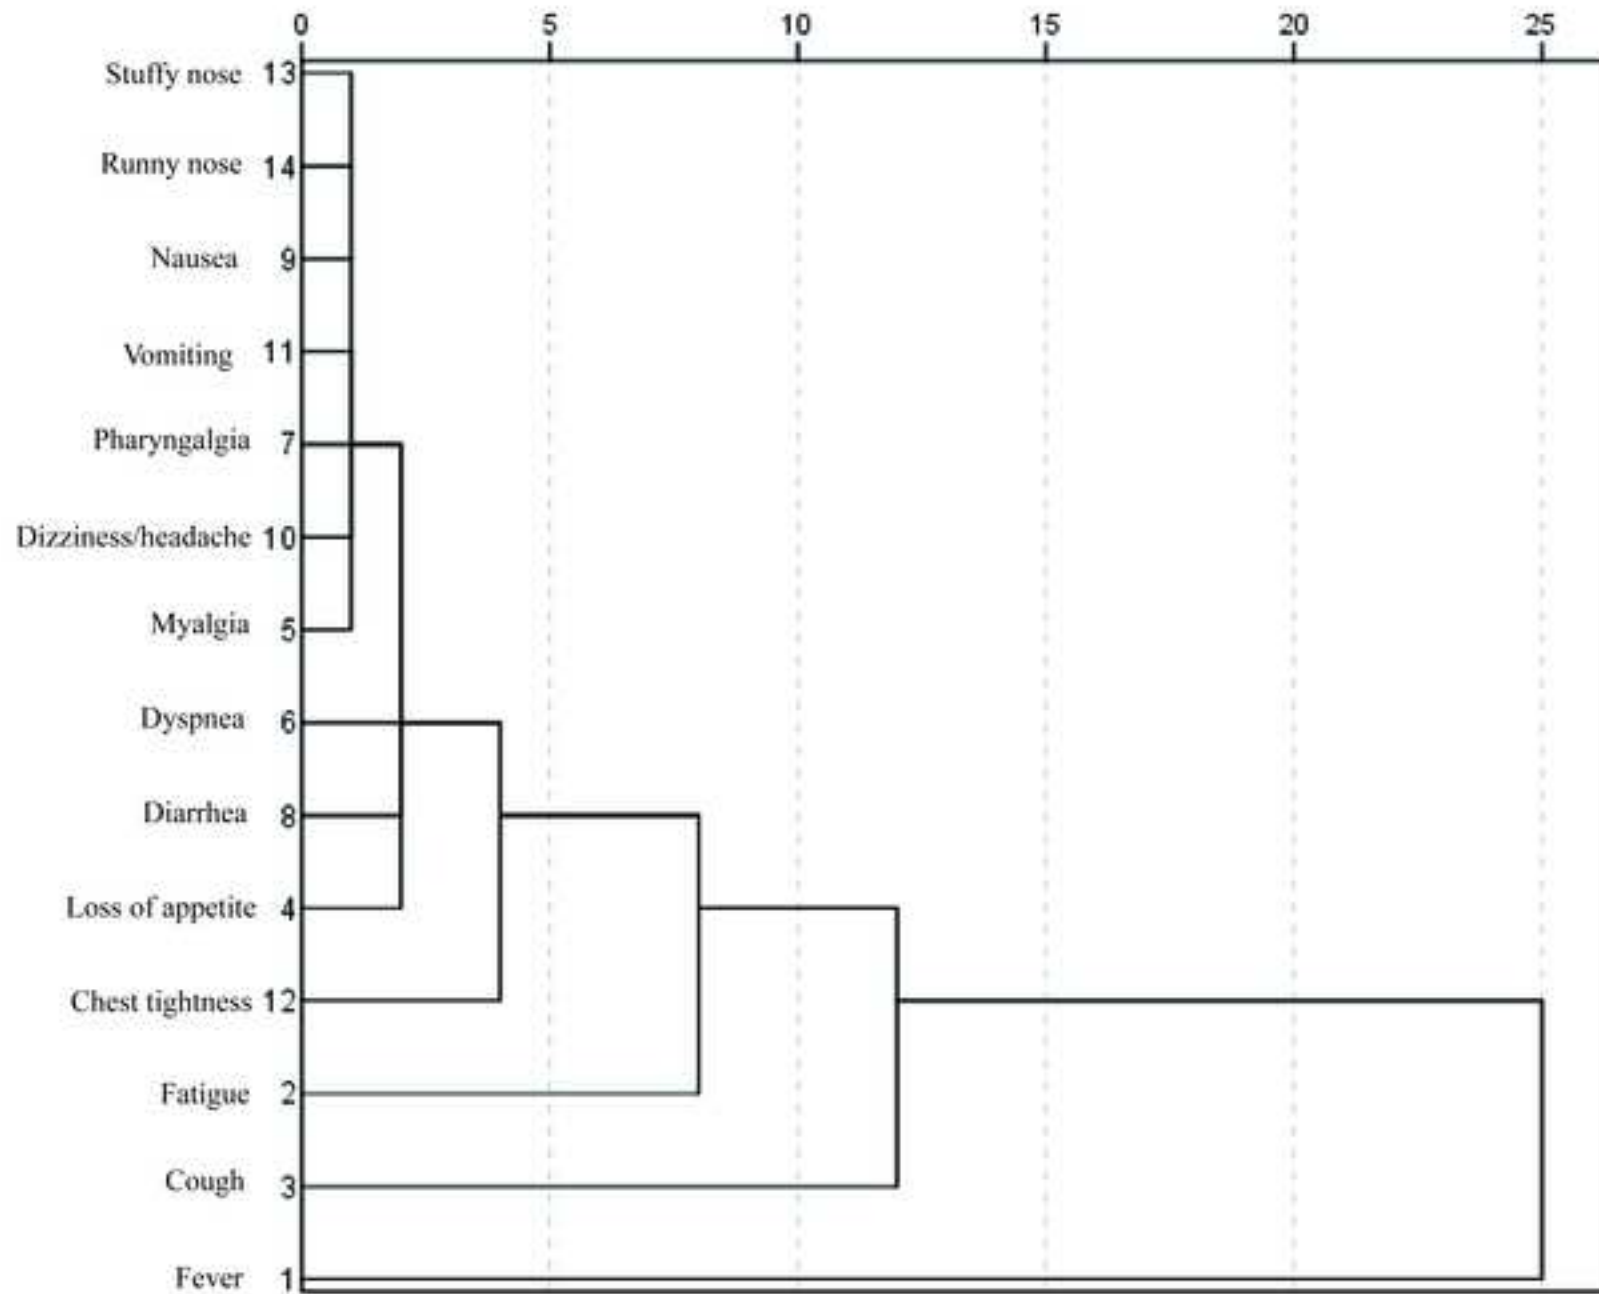

**Supplementary Figure1. Cluster diagram of clinical symptoms of patients with COVID-19**
